# Supplementary material for: Biomolecule-assisted synthesis of defect-mediated Cd1−xZnxS/MoS2/graphene hollow spheres for highly efficient hydrogen evolution
Source: Royal Society of Chemistry journal article supplement (doi:10.1039/c6cp01322h), 2016-01-01
Supplement: c6cp01322h1.pdf [file c6cp01322h1.pdf]

## Supporting Information

### Biomolecule-assisted Synthesis of $\text{Cd}_{1-x}\text{Zn}_x\text{S}/\text{MoS}_2/\text{Graphene}$ Hollow Spheres for Highly Efficient Hydrogen Evolution

Ruifeng Du,<sup>a</sup> Yihe Zhang,<sup>\*,a</sup> Baoying Li,<sup>a</sup> Xuelian Yu,<sup>\*,a</sup> Huijuan Liu,<sup>b</sup> Xiaoqiang An,<sup>\*,b</sup> and Jiuhui Qu<sup>b</sup>

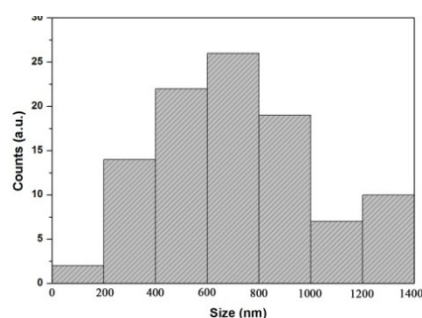

**Figure S1.** Particle size distribution of  $\text{Cd}_{0.8}\text{Zn}_{0.2}\text{S}/\text{MoS}_2/\text{graphene}$  hollow spheres.

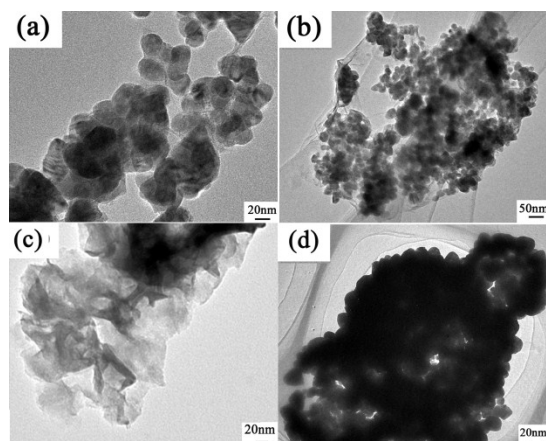

**Figure S2.** TEM images of (a) blank  $\text{Cd}_{0.8}\text{Zn}_{0.2}\text{S}$ ; (b)  $\text{Cd}_{0.8}\text{Zn}_{0.2}\text{S}/\text{graphene}$ ; and (c)  $\text{MoS}_2/\text{graphene}$  composites. (d)  $\text{CuInS}_2/\text{MoS}_2/\text{graphene}$  hollow spheres.

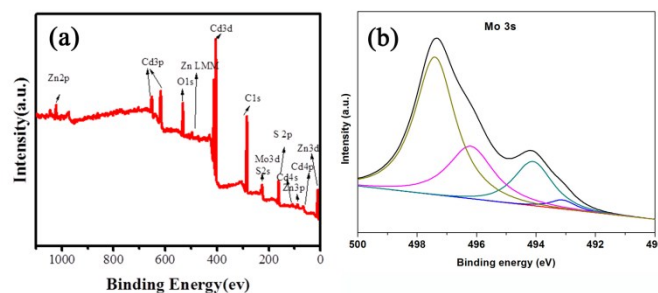

**Figure S3.** Full XPS spectrum (a) and Mo 3s spectrum (b) of  $\text{Cd}_{0.8}\text{Zn}_{0.2}\text{S}/\text{MoS}_2/\text{graphene}$  hollow spheres.

Figure S4 shows the high-resolution XPS spectrum and Auger spectrum of  $\text{ZnL}_{3/4.5}\text{M}_{4.5}$  in  $\text{Cd}_{0.8}\text{Zn}_{0.2}\text{S}/\text{MoS}_2/\text{graphene}$  hollow spheres. The binding energy of Zn  $2p_{3/2}$  and kinetics energy of Auger transition are located at 1022.1 eV and 989 eV, respectively. The Auger parameter, defined as the difference in kinetic energy between an Auger line and a core-level line, is determined to be 2011.1 eV. This value is different from that of metallic Zinc (2013.8 eV), confirming the formation of zinc-based sulfides in the solid solutions.

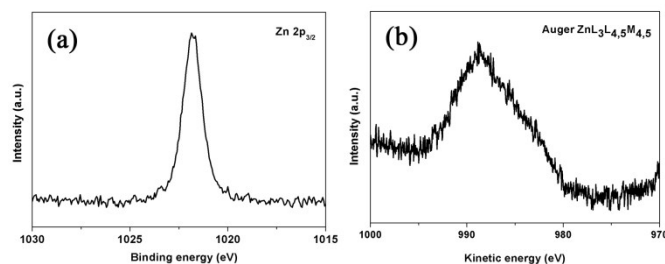

**Figure S4.** Zn ( $\text{L}_{3/4.5}\text{M}_{4.5}$ ) Auger spectra of  $\text{Cd}_{0.8}\text{Zn}_{0.2}\text{S}/\text{MoS}_2/\text{graphene}$

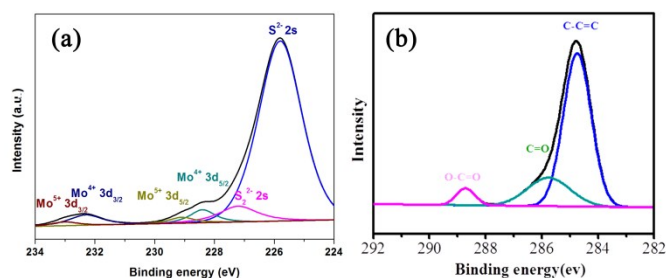

**Figure S5.** (a) S 2s spectrum and C 1s spectrum (b) of  $\text{Cd}_{0.8}\text{Zn}_{0.2}\text{S}/\text{MoS}_2/\text{graphene}$  hollow spheres.

To further determine the chemical structures, Raman spectroscopy of  $\text{Cd}_{0.8}\text{Zn}_{0.2}\text{S}/\text{MoS}_2/\text{graphene}$  was studied in Figure S5. The longitudinal optical (LO) phonon peaks of sulfide are seen at about  $304\text{ cm}^{-1}$ ,  $608\text{ cm}^{-1}$  (second order) and  $924\text{ cm}^{-1}$  (third order) for the  $\text{Cd}_{0.8}\text{Zn}_{0.2}\text{S}$ . The peak at  $1338\text{ cm}^{-1}$  (D band) is associated with vibrations of carbon atoms with dangling bonds in plane terminations of disordered graphite. The peak at  $1588\text{ cm}^{-1}$  (G band) corresponds to the vibration of  $\text{sp}^2$ -bonded carbon atoms in a hexagonal lattice. The small peak intensity ratio of  $I(\text{D})/I(\text{G})$  indicates the presence of graphene with restored structures in the composites.

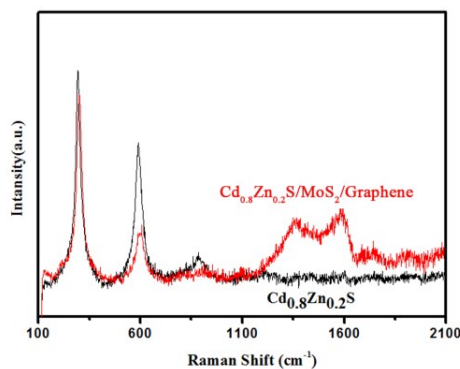

**Figure S6.** Raman spectra of  $\text{Cd}_{0.8}\text{Zn}_{0.2}\text{S}$  nanoparticles and  $\text{Cd}_{0.8}\text{Zn}_{0.2}\text{S}/\text{MoS}_2/\text{graphene}$  hollow spheres.

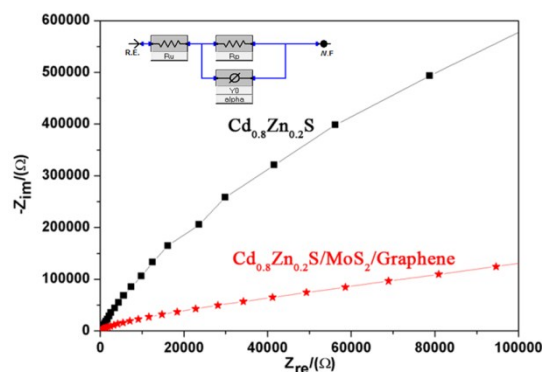

**Figure S7.** Electrochemical impedance spectra (EIS) of  $\text{Cd}_{0.8}\text{Zn}_{0.2}\text{S}$  nanoparticles and  $\text{Cd}_{0.8}\text{Zn}_{0.2}\text{S}/\text{MoS}_2/\text{graphene}$  hollow spheres. Inset is the equivalent circuit.
